# Supplementary material for: Epidemiology and Management of Proximal Femoral Fractures in Italy between 2001 and 2016 in Older Adults: Analysis of the National Discharge Registry
Source: MDPI journal article supplement (doi:10.3390/ijerph192416985), 2022-12-17
Supplement: s1 [file s1]

Supplementary Table S2. Type of fracture based on age and gender.

| TOTAL |                  |                  |                 |               |                |               |                   |                  |                 |                |                |               |                  |
|-------|------------------|------------------|-----------------|---------------|----------------|---------------|-------------------|------------------|-----------------|----------------|----------------|---------------|------------------|
|       | 82001            | 82002            | 82003           | 82011         | 82012          | 82013         | 82020             | 82021            | 82022           | 82030          | 82031          | 82032         | unspecified      |
| 65-69 | 13455<br>(17,6%) | 10088<br>(13,2%) | 6638<br>(8,7%)  | 111<br>(0,1%) | 416<br>(0,5%)  | 228<br>(0,3%) | 20943<br>(27,4%)  | 6959<br>(9,1%)   | 4327<br>(5,7%)  | 268<br>(0,4%)  | 206<br>(0,3%)  | 182<br>(0,2%) | 12701<br>(16,6%) |
| 70-74 | 23534<br>(16,6%) | 17448<br>(12,3%) | 11954<br>(8,4%) | 153<br>(0,1%) | 729<br>(0,5%)  | 366<br>(0,3%) | 41944<br>(29,6%)  | 13929<br>(9,8%)  | 7789<br>(5,5%)  | 502<br>(0,4%)  | 387<br>(0,3%)  | 304<br>(0,2%) | 22697<br>(16%)   |
| 74-79 | 39179<br>(15,2%) | 29319<br>(11,3%) | 21479<br>(8,3%) | 256<br>(0,1%) | 1245<br>(0,5%) | 690<br>(0,3%) | 83664<br>(32,4%)  | 27612<br>(10,7%) | 13724<br>(5,3%) | 932<br>(0,4%)  | 710<br>(0,3%)  | 509<br>(0,2%) | 39127<br>(15,1%) |
| 80-84 | 54486<br>(14,4%) | 40836<br>(10,8%) | 30065<br>(7,9%) | 365<br>(0,1%) | 1681<br>(0,4%) | 984<br>(0,3%) | 130596<br>(34,4%) | 43935<br>(11,6%) | 20093<br>(5,3%) | 1318<br>(0,3%) | 1208<br>(0,3%) | 685<br>(0,2%) | 52975<br>(14%)   |
| 85-89 | 48371<br>(13,3%) | 37201<br>(10,2%) | 28085<br>(7,7%) | 341<br>(0,1%) | 1588<br>(0,4%) | 895<br>(0,2%) | 131509<br>(36,2%) | 45702<br>(12,6%) | 18379<br>(5,1%) | 1294<br>(0,4%) | 1254<br>(0,3%) | 626<br>(0,2%) | 48271<br>(13,3%) |
| 90-94 | 26100<br>(12,5%) | 20422<br>(9,8%)  | 16721<br>(8%)   | 179<br>(0,1%) | 868<br>(0,4%)  | 491<br>(0,2%) | 77621<br>(37,1%)  | 27587<br>(13,2%) | 10323<br>(4,9%) | 685<br>(0,3%)  | 840<br>(0,4%)  | 393<br>(0,2%) | 27035<br>(12,9%) |
| 95-99 | 6634 (12,1%)     | 5337<br>(9,7%)   | 4399<br>(8%)    | 50<br>(0,1%)  | 218<br>(0,4%)  | 124<br>(0,2%) | 20805<br>(37,8%)  | 7430<br>(13,5%)  | 2641<br>(4,8%)  | 181<br>(0,3%)  | 217<br>(0,4%)  | 102<br>(0,2%) | 6867<br>(12,5%)  |
| +99   | 749 (11,7%)      | 596<br>(9,3%)    | 524<br>(8,2%)   | 3 (0%)        | 26<br>(0,4%)   | 6 (0,1%)      | 2417<br>(37,6%)   | 961<br>(15%)     | 295<br>(4,6%)   | 19<br>(0,3%)   | 31<br>(0,5%)   | 12<br>(0,2%)  | 786<br>(12,2%)   |
| MALES |                  |                  |                 |               |                |               |                   |                  |                 |                |                |               |                  |
| 65-69 | 3341 (14,1%)     | 2923<br>(12,3%)  | 1991<br>(8,4%)  | 35<br>(0,1%)  | 107<br>(0,5%)  | 72<br>(0,3%)  | 7214<br>(30,5%)   | 2472<br>(10,4%)  | 1547<br>(6,5%)  | 103<br>(0,4%)  | 57<br>(0,2%)   | 75<br>(0,3%)  | 3753<br>(15,8%)  |
| 70-74 | 5705 (14,6%)     | 4654<br>(11,9%)  | 3357<br>(8,6%)  | 50<br>(0,1%)  | 191<br>(0,5%)  | 104<br>(0,3%) | 12218<br>(31,3%)  | 4140<br>(10,6%)  | 2321<br>(5,9%)  | 152<br>(0,4%)  | 116<br>(0,3%)  | 94<br>(0,2%)  | 5942<br>(15,2%)  |
| 74-79 | 9329 (14,5%)     | 7438<br>(11,6%)  | 5484<br>(8,5%)  | 60<br>(0,1%)  | 307<br>(0,5%)  | 188<br>(0,3%) | 20745<br>(32,3%)  | 6967<br>(10,9%)  | 3294<br>(5,1%)  | 253<br>(0,4%)  | 165<br>(0,3%)  | 137<br>(0,2%) | 9792<br>(15,3%)  |
| 80-84 | 13056<br>(14,9%) | 10021<br>(11,4%) | 7287<br>(8,3%)  | 102<br>(0,1%) | 417<br>(0,5%)  | 257<br>(0,3%) | 28930<br>(33%)    | 9787<br>(11,2%)  | 4149<br>(4,7%)  | 320<br>(0,4%)  | 282<br>(0,3%)  | 125<br>(0,1%) | 12943<br>(14,8%) |

|         |               |               |              |            |             |            |                |               |              |            |            |            |               |
|---------|---------------|---------------|--------------|------------|-------------|------------|----------------|---------------|--------------|------------|------------|------------|---------------|
| 85-89   | 11877 (15%)   | 9176 (11,6%)  | 6467 (8,2%)  | 91 (0,1%)  | 365 (0,5%)  | 218 (0,3%) | 26327 (33,2%)  | 9292 (11,7%)  | 3387 (4,3%)  | 312 (0,4%) | 269 (0,3%) | 99 (0,1%)  | 11439 (14,4%) |
| 90-94   | 6257 (14,6%)  | 5001 (11,6%)  | 3642 (8,5%)  | 43 (0,1%)  | 198 (0,5%)  | 124 (0,3%) | 14360 (33,4%)  | 5081 (11,8%)  | 1694 (3,9%)  | 143 (0,3%) | 158 (0,4%) | 76 (0,2%)  | 6174 (14,4%)  |
| 95-99   | 1512 (14,5%)  | 1214 (11,6%)  | 948 (9,1%)   | 11 (0,1%)  | 57 (0,5%)   | 17 (0,2%)  | 3442 (32,9%)   | 1271 (12,1%)  | 417 (4%)     | 34 (0,3%)  | 36 (0,3%)  | 12 (0,1%)  | 1492 (14,3%)  |
| +99     | 175 (16,2%)   | 133 (12,3%)   | 87 (8,1%)    | 1 (0,1%)   | 8 (0,7%)    | 1 (0,1%)   | 352 (32,6%)    | 107 (9,9%)    | 42 (3,9%)    | 3 (0,3%)   | 5 (0,5%)   | 4 (0,4%)   | 161 (14,9%)   |
| FEMALES |               |               |              |            |             |            |                |               |              |            |            |            |               |
| 65-69   | 10114 (19,1%) | 7165 (13,6%)  | 4647 (8,8%)  | 76 (0,1%)  | 309 (0,6%)  | 156 (0,3%) | 13729 (26%)    | 4487 (8,5%)   | 2780 (5,3%)  | 165 (0,3%) | 149 (0,3%) | 107 (0,2%) | 8948 (16,9%)  |
| 70-74   | 17829 (17,4%) | 12794 (12,5%) | 8597 (8,4%)  | 103 (0,1%) | 538 (0,5%)  | 262 (0,3%) | 29726 (28,9%)  | 9789 (9,5%)   | 5468 (5,3%)  | 350 (0,3%) | 271 (0,3%) | 210 (0,2%) | 16755 (16,3%) |
| 74-79   | 29850 (15,4%) | 21881 (11,3%) | 15995 (8,2%) | 196 (0,1%) | 938 (0,5%)  | 502 (0,3%) | 62919 (32,4%)  | 20645 (10,6%) | 10430 (5,4%) | 679 (0,3%) | 545 (0,3%) | 372 (0,2%) | 29335 (15,1%) |
| 80-84   | 41430 (14,2%) | 30815 (10,6%) | 22778 (7,8%) | 263 (0,1%) | 1264 (0,4%) | 727 (0,2%) | 101666 (34,9%) | 34148 (11,7%) | 15944 (5,5%) | 998 (0,3%) | 926 (0,3%) | 560 (0,2%) | 40032 (13,7%) |
| 85-89   | 36494 (12,8%) | 28025 (9,9%)  | 21618 (7,6%) | 250 (0,1%) | 1223 (0,4%) | 677 (0,2%) | 105182 (37%)   | 36410 (12,8%) | 14992 (5,3%) | 982 (0,3%) | 985 (0,3%) | 528 (0,2%) | 36831 (13%)   |
| 90-94   | 19843 (11,9%) | 15421 (9,3%)  | 13079 (7,9%) | 136 (0,1%) | 670 (0,4%)  | 367 (0,2%) | 63261 (38%)    | 22506 (13,5%) | 8629 (5,2%)  | 542 (0,3%) | 682 (0,4%) | 317 (0,2%) | 20861 (12,5%) |
| 95-99   | 5122 (11,5%)  | 4123 (9,3%)   | 3451 (7,7%)  | 39 (0,1%)  | 161 (0,4%)  | 107 (0,2%) | 17363 (39%)    | 6159 (13,8%)  | 2224 (5%)    | 147 (0,3%) | 181 (0,4%) | 90 (0,2%)  | 5375 (12,1%)  |
| +99     | 574 (10,7%)   | 463 (8,7%)    | 437 (8,2%)   | 2 (0%)     | 18 (0,3%)   | 5 (0,1%)   | 2065 (38,6%)   | 854 (16%)     | 253 (4,7%)   | 16 (0,3%)  | 26 (0,5%)  | 8 (0,1%)   | 625 (11,7%)   |

Data are reported as absolute frequency and row percentage for each age class; 82001, closed upper transcervical fracture; 82002, closed midcervical fracture; 82003, closed basicervical fracture; 82011, open upper transcervical fracture; 82012, open midcervical fracture; 82013, basicervical fracture; 82020, closed trochanteric fracture; 82021, closed intratrochanteric fracture; 82022, closed subtrochanteric fracture; 82030, open trochanteric fracture; 82031, open intratrochanteric fracture; 82032, open subtrochanteric fracture.
