# Supplementary material for: Epidemiology and Management of Proximal Femoral Fractures in Italy between 2001 and 2016 in Older Adults: Analysis of the National Discharge Registry
Source: MDPI journal article supplement (doi:10.3390/ijerph192416985), 2022-12-17
Supplement: s1 [file s1]

| SUBJECTS AT RISK                        |          |          |          |          |          |          |          |          |          |          |          |          |          |          |          |          |                               |                      |
|-----------------------------------------|----------|----------|----------|----------|----------|----------|----------|----------|----------|----------|----------|----------|----------|----------|----------|----------|-------------------------------|----------------------|
| Age category                            | 2001     | 2002     | 2003     | 2004     | 2005     | 2006     | 2007     | 2008     | 2009     | 2010     | 2011     | 2012     | 2013     | 2014     | 2015     | 2016     | Total per age category        | age-specific weighth |
| 65-69                                   | 3073473  | 3110160  | 3175010  | 3245826  | 3305695  | 3330888  | 3310485  | 3248401  | 3163189  | 3052238  | 3132885  | 3266751  | 3447791  | 3561371  | 3561371  | 3684918  | 52670452                      | 0,271                |
| 70-74                                   | 2806332  | 2827563  | 2845138  | 2868206  | 2855635  | 2860272  | 2895708  | 2963744  | 3035304  | 3102183  | 3079669  | 3067340  | 3044129  | 2962274  | 2962274  | 2856226  | 47031997                      | 0,242                |
| 75-79                                   | 2276531  | 2318298  | 2342508  | 2367105  | 2422471  | 2461918  | 2477023  | 2500298  | 2530250  | 2533595  | 2501983  | 2548841  | 2645596  | 2717980  | 2717980  | 2779553  | 40141930                      | 0,207                |
| 80-84                                   | 1267135  | 1443173  | 1617294  | 1742300  | 1763978  | 1795994  | 1830380  | 1855159  | 1882772  | 1941292  | 1943792  | 1967415  | 2013904  | 2047054  | 2047054  | 2054494  | 29213190                      | 0,151                |
| 85-89                                   | 830535   | 762848   | 685613   | 664383   | 738158   | 842446   | 957772   | 1071115  | 1147892  | 1171062  | 1173319  | 1204887  | 1235881  | 1264039  | 1264039  | 1305410  | 16319399                      | 0,084                |
| 90-94                                   | 331701   | 362692   | 379956   | 399042   | 405204   | 390675   | 354223   | 318488   | 312948   | 362732   | 410027   | 466302   | 518906   | 555492   | 555492   | 561890   | 6685770                       | 0,034                |
| 95-99                                   | 63292    | 69487    | 75195    | 83388    | 91040    | 99062    | 107807   | 114220   | 119141   | 122290   | 114118   | 101903   | 90851    | 91769    | 91769    | 108498   | 1543830                       | 0,008                |
| 100+                                    | 5650     | 7108     | 7767     | 9091     | 10154    | 11497    | 12588    | 13733    | 14974    | 16145    | 15029    | 16390    | 17884    | 19095    | 19095    | 18765    | 214965                        | 0,001                |
| Population per year                     | 10654649 | 10901329 | 11128481 | 11379341 | 11592335 | 11792752 | 11945986 | 12085158 | 12206470 | 12301537 | 12370822 | 12639829 | 13014942 | 13219074 | 13219074 | 13369754 | 193821533                     |                      |
| EVENTS                                  |          |          |          |          |          |          |          |          |          |          |          |          |          |          |          |          |                               |                      |
| Age category                            | 2001     | 2002     | 2003     | 2004     | 2005     | 2006     | 2007     | 2008     | 2009     | 2010     | 2011     | 2012     | 2013     | 2014     | 2015     | 2016     | Total events per age category |                      |
| 65-69                                   | 4726     | 4714     | 4698     | 4962     | 4987     | 5006     | 5001     | 5004     | 4845     | 4559     | 4206     | 4499     | 4591     | 4578     | 5058     | 5088     | 76522                         |                      |
| 70-74                                   | 9305     | 9432     | 8924     | 9568     | 9495     | 9226     | 9004     | 9094     | 8985     | 8692     | 8570     | 8738     | 8483     | 8248     | 8125     | 7847     | 141736                        |                      |
| 74-79                                   | 16421    | 16052    | 16006    | 16423    | 17131    | 17015    | 16958    | 17208    | 17063    | 16180    | 15391    | 15450    | 15132    | 15106    | 15440    | 15470    | 258446                        |                      |
| 80-84                                   | 16709    | 19266    | 21615    | 23753    | 24953    | 25228    | 25477    | 25965    | 25516    | 25264    | 24310    | 24559    | 24163    | 24167    | 24405    | 23877    | 379227                        |                      |
| 85-89                                   | 19871    | 18812    | 16724    | 15400    | 16538    | 17943    | 20957    | 23975    | 26514    | 26409    | 26182    | 26740    | 26491    | 26424    | 27152    | 27384    | 363516                        |                      |
| 90-94                                   | 11643    | 12226    | 13054    | 12339    | 13358    | 12833    | 11904    | 11190    | 9814     | 10746    | 11587    | 13529    | 14724    | 16339    | 17027    | 16952    | 209265                        |                      |
| 95-99                                   | 2703     | 2941     | 3179     | 2782     | 3144     | 3457     | 3606     | 3942     | 4067     | 4170     | 3995     | 3598     | 3287     | 2898     | 3366     | 3870     | 55005                         |                      |
| 100+                                    | 270      | 320      | 339      | 234      | 289      | 329      | 353      | 361      | 377      | 453      | 457      | 491      | 530      | 537      | 575      | 510      | 6425                          |                      |
| Events per year                         | 81648    | 83763    | 84539    | 85461    | 89895    | 91037    | 93260    | 96739    | 97181    | 96473    | 94698    | 97604    | 97401    | 98297    | 101148   | 100998   | 1490142                       |                      |
| Raw incidence (x 100,000 subjects)      | 766,3134 | 768,3742 | 759,6634 | 751,0189 | 775,4693 | 771,9742 | 780,6806 | 800,4777 | 796,1434 | 784,2353 | 765,4948 | 772,194  | 748,3783 | 743,5997 | 765,1671 | 755,4215 | 768,8216974                   |                      |
| AGE ADJUSTED EVENTS PER 100,000 PERSONS |          |          |          |          |          |          |          |          |          |          |          |          |          |          |          |          |                               |                      |

| Age category                                         | 2001     | 2002     | 2003     | 2004     | 2005     | 2006     | 2007     | 2008     | 2009     | 2010     | 2011     | 2012     | 2013     | 2014     | 2015     | 2016     | Mean age-adjusted incidence per age category |  |
|------------------------------------------------------|----------|----------|----------|----------|----------|----------|----------|----------|----------|----------|----------|----------|----------|----------|----------|----------|----------------------------------------------|--|
| 65-69                                                | 41,78586 | 41,18811 | 40,20989 | 41,54287 | 40,99601 | 40,84095 | 41,05162 | 41,8613  | 41,62303 | 40,58974 | 36,48294 | 37,42527 | 36,18523 | 34,93201 | 38,59461 | 37,52185 | 39,48064945                                  |  |
| 70-74                                                | 80,45791 | 80,94367 | 76,11103 | 80,94727 | 80,6833  | 78,27039 | 75,45224 | 74,45702 | 71,83023 | 67,98979 | 67,52556 | 69,12601 | 67,62041 | 67,56392 | 66,55636 | 66,66571 | 73,12706581                                  |  |
| 75-79                                                | 149,3903 | 143,4023 | 141,5135 | 143,6915 | 146,4604 | 143,1379 | 141,7884 | 142,5394 | 139,6652 | 132,2628 | 127,4027 | 125,54   | 118,4593 | 115,1064 | 117,6514 | 115,2687 | 133,3422536                                  |  |
| 80-84                                                | 198,7488 | 201,2103 | 201,4388 | 205,4814 | 213,2095 | 211,7166 | 209,7896 | 210,9522 | 204,264  | 196,15   | 188,5003 | 188,1446 | 180,8377 | 177,9387 | 179,6911 | 175,1668 | 195,6578271                                  |  |
| 85-89                                                | 201,4484 | 207,6343 | 205,3824 | 195,1661 | 188,6409 | 179,3309 | 184,2337 | 188,4624 | 194,4806 | 189,8778 | 187,8836 | 186,8604 | 180,4778 | 176,0112 | 180,8604 | 176,625  | 187,5519166                                  |  |
| 90-94                                                | 121,0786 | 116,2775 | 118,5113 | 106,6623 | 113,7148 | 113,3084 | 115,9219 | 121,1955 | 108,1741 | 102,1905 | 97,4783  | 100,0801 | 97,87832 | 101,4605 | 105,7328 | 104,0684 | 107,9678799                                  |  |
| 95-99                                                | 34,0169  | 33,71234 | 33,67433 | 26,57364 | 27,50729 | 27,79648 | 26,64258 | 27,48982 | 27,19007 | 27,1608  | 27,88432 | 28,12365 | 28,81824 | 25,15358 | 29,21565 | 28,41101 | 28,37919975                                  |  |
| 100+                                                 | 5,300063 | 4,993077 | 4,840744 | 2,854762 | 3,15665  | 3,173782 | 3,110167 | 2,915463 | 2,792346 | 3,111902 | 3,372499 | 3,322525 | 3,286828 | 3,119036 | 3,33975  | 3,014306 | 3,314905161                                  |  |
| Age-adjusted incidence per year (x 100,000 subjects) | 832,2269 | 829,3616 | 821,6821 | 802,9198 | 814,3689 | 797,5753 | 797,9903 | 809,8731 | 790,0196 | 759,3332 | 736,5303 | 738,6225 | 713,5639 | 701,2853 | 721,6421 | 706,7418 | 768,8216974                                  |  |

Weight: Total population per age category/ sum of (Total population per age category)

Raw incidence: population per year/events per year \* 100,000

Age-adjusted incidence per year: column sum of ((number of events per year per age category/subjects at risk per year per age category)\*age-specific weight\*100,000 subjects)
