# Supplementary material for: Epidemiology and Management of Proximal Femoral Fractures in Italy between 2001 and 2016 in Older Adults: Analysis of the National Discharge Registry
Source: MDPI journal article supplement (doi:10.3390/ijerph192416985), 2022-12-17
Supplement: s1 [file s1]

Supplementary Table S4. Incidence of different treatments during the study years in pertrochanteric and transcervical fractures.

| PERTROCHANTERIC FRACTURES |      |      |      |      |      |      |      |      |      |      |      |      |      |      |      |      |
|---------------------------|------|------|------|------|------|------|------|------|------|------|------|------|------|------|------|------|
|                           | 2001 | 2002 | 2003 | 2004 | 2005 | 2006 | 2007 | 2008 | 2009 | 2010 | 2011 | 2012 | 2013 | 2014 | 2015 | 2016 |
| HA                        | 2,3  | 2,4  | 2,0  | 2,4  | 2,4  | 2,4  | 2,5  | 2,4  | 2,1  | 2,0  | 1,9  | 1,6  | 1,6  | 1,6  | 1,6  | 1,4  |
| THA                       | 0,8  | 0,9  | 0,9  | 1,0  | 1,0  | 1,1  | 1,2  | 1,0  | 0,9  | 0,8  | 0,8  | 0,8  | 0,8  | 0,7  | 0,7  | 0,7  |
| CRwIF                     | 16,6 | 13,8 | 13,2 | 12,7 | 12,4 | 12,2 | 11,2 | 11,7 | 11,9 | 13,0 | 13,8 | 14,9 | 15,6 | 16,2 | 17,1 | 17,3 |
| ORwIF                     | 54,3 | 57,5 | 59,6 | 61,1 | 60,4 | 61,0 | 59,7 | 58,8 | 59,6 | 63,6 | 64,2 | 64,1 | 65,0 | 64,7 | 64,5 | 64,6 |
| Non Surgical              | 21,2 | 20,8 | 20,0 | 19,1 | 20,3 | 19,8 | 22,6 | 23,3 | 22,8 | 18,1 | 17,3 | 16,6 | 15,0 | 14,7 | 14,5 | 14,5 |
| Other                     | 4,7  | 4,5  | 4,4  | 3,6  | 3,4  | 3,4  | 2,8  | 2,8  | 2,7  | 2,5  | 2,0  | 2,1  | 2,0  | 2,1  | 1,7  | 1,5  |
| TRANSCERVICAL FRACTURES   |      |      |      |      |      |      |      |      |      |      |      |      |      |      |      |      |
| HA                        | 46,3 | 46,5 | 46,9 | 47,4 | 47,0 | 47,6 | 47,6 | 48,3 | 48,8 | 50,7 | 51,6 | 52,0 | 52,6 | 52,7 | 51,9 | 51,7 |
| THA                       | 13,2 | 15,0 | 16,6 | 17,2 | 17,3 | 18,4 | 18,6 | 17,6 | 18,0 | 18,3 | 17,7 | 17,9 | 17,4 | 17,8 | 18,9 | 19,1 |
| CRwIF                     | 4,3  | 3,6  | 3,1  | 2,8  | 2,7  | 2,6  | 2,2  | 2,3  | 2,3  | 2,5  | 2,5  | 2,8  | 3,0  | 3,2  | 3,3  | 3,7  |
| ORwIF                     | 13,6 | 13,6 | 13,0 | 12,9 | 11,9 | 12,1 | 11,4 | 11,7 | 11,0 | 11,2 | 10,8 | 11,0 | 10,8 | 10,8 | 11,1 | 10,5 |
| Non Surgical              | 20,7 | 19,3 | 18,5 | 17,9 | 19,5 | 17,8 | 18,7 | 18,9 | 18,8 | 16,3 | 16,5 | 15,4 | 15,4 | 14,6 | 14,1 | 14,2 |
| Other                     | 2,0  | 1,9  | 1,9  | 1,8  | 1,6  | 1,6  | 1,5  | 1,2  | 1,1  | 1,0  | 0,9  | 0,8  | 0,8  | 0,9  | 0,8  | 0,8  |

Data are reported as incidence of treatment per 100 events. HA, hemiarthroplasty; THA, total hip arthroplasty; CRwIF, closed reduction with internal fixation; ORwIF, open reduction with internal fixation; "Other" includes open and closed reductions without internal fixation, other reductions and combinations of the other techniques.
