# Supplementary material for: Epidemiology and Management of Proximal Femoral Fractures in Italy between 2001 and 2016 in Older Adults: Analysis of the National Discharge Registry
Source: MDPI journal article supplement (doi:10.3390/ijerph192416985), 2022-12-17
Supplement: s1 [file s1]

Supplementary Table S3. Therapeutic management in different types of fracture and age categories.

|                 | HA            | THA           | CRwIF         | CRw/oIF    | ORwIF          | ORw/oIF    | Other       | Non-surgical  |
|-----------------|---------------|---------------|---------------|------------|----------------|------------|-------------|---------------|
| PERTROCHANTERIC |               |               |               |            |                |            |             |               |
| 65-69           | 399 (1,2%)    | 653 (2%)      | 4087 (12,4%)  | 161 (0,5%) | 19908 (60,5%)  | 28 (0,1%)  | 992 (3%)    | 6657 (20,2%)  |
| 70-74           | 1102 (1,7%)   | 1029 (1,6%)   | 8231 (12,7%)  | 329 (0,5%) | 39347 (60,7%)  | 74 (0,1%)  | 1716 (2,6%) | 13027 (20,1%) |
| 74-79           | 2459 (1,9%)   | 1593 (1,3%)   | 16578 (13%)   | 624 (0,5%) | 77710 (61,1%)  | 118 (0,1%) | 3101 (2,4%) | 24969 (19,6%) |
| 80-84           | 4184 (2,1%)   | 1620 (0,8%)   | 27148 (13,7%) | 859 (0,4%) | 122600 (62%)   | 166 (0,1%) | 4405 (2,2%) | 36854 (18,6%) |
| 85-89           | 4164 (2,1%)   | 1172 (0,6%)   | 29237 (14,7%) | 918 (0,5%) | 123438 (62,1%) | 163 (0,1%) | 4014 (2%)   | 35660 (17,9%) |
| 90-94           | 2519 (2,1%)   | 547 (0,5%)    | 18055 (15,4%) | 617 (0,5%) | 72670 (61,9%)  | 118 (0,1%) | 2399 (2%)   | 20524 (17,5%) |
| 95-99           | 680 (2,2%)    | 101 (0,3%)    | 4778 (15,2%)  | 177 (0,6%) | 19163 (61,1%)  | 24 (0,1%)  | 596 (1,9%)  | 5857 (18,7%)  |
| +99             | 73 (2%)       | 14 (0,4%)     | 611 (16,4%)   | 25 (0,7%)  | 2238 (59,9%)   | 6 (0,2%)   | 93 (2,5%)   | 675 (18,1%)   |
| TRANSCERVICAL   |               |               |               |            |                |            |             |               |
| 65-69           | 6191 (18,8%)  | 12910 (39,3%) | 1404 (4,3%)   | 73 (0,2%)  | 5084 (15,5%)   | 7 (0%)     | 346 (1,1%)  | 4921 (15%)    |
| 70-74           | 16495 (25,4%) | 19282 (29,7%) | 1805 (2,8%)   | 141 (0,2%) | 6978 (10,8%)   | 15 (0%)    | 547 (0,8%)  | 8921 (13,8%)  |
| 74-79           | 40790 (32,1%) | 22074 (17,4%) | 2442 (1,9%)   | 228 (0,2%) | 10525 (8,3%)   | 15 (0%)    | 869 (0,7%)  | 15225 (12%)   |
| 80-84           | 70757 (35,8%) | 17522 (8,9%)  | 3376 (1,7%)   | 334 (0,2%) | 13770 (7%)     | 25 (0%)    | 1111 (0,6%) | 21522 (10,9%) |
| 85-89           | 68714 (34,6%) | 10756 (5,4%)  | 3027 (1,5%)   | 372 (0,2%) | 12699 (6,4%)   | 27 (0%)    | 1015 (0,5%) | 19871 (10%)   |
| 90-94           | 37955 (32,3%) | 4685 (4%)     | 1953 (1,7%)   | 283 (0,2%) | 7380 (6,3%)    | 9 (0%)     | 615 (0,5%)  | 11901 (10,1%) |
| 95-99           | 9331 (29,7%)  | 1102 (3,5%)   | 499 (1,6%)    | 84 (0,3%)  | 1993 (6,4%)    | 10 (0%)    | 156 (0,5%)  | 3587 (11,4%)  |
| +99             | 994 (26,6%)   | 115 (3,1%)    | 70 (1,9%)     | 10 (0,3%)  | 261 (7%)       | 2 (0,1%)   | 14 (0,4%)   | 438 (11,7%)   |

Data are reported as absolute frequency and row percentage for each age category. HA, hemiarthroplasty; THA, total hip arthroplasty; CRwIF, closed reduction with internal fixation; CRw/oIF, closed reduction without internal fixation; ORwIF, open reduction with internal fixation; ORw/oIF, open reduction without internal fixation;
