# Supplementary material for: Epidemiology and Management of Proximal Femoral Fractures in Italy between 2001 and 2016 in Older Adults: Analysis of the National Discharge Registry
Source: Int J Environ Res Public Health. 2022 Dec 17;19(24):16985. doi: 10.3390/ijerph192416985 (PMC9778915; doi:10.3390/ijerph192416985)
Supplement: Supplementary file 1 [file ijerph-19-16985-s001.zip]

Archive with 5 entries (5 files):
- STROBE-checklist-v4-cohort.pdf
- supplementary Table S1_new.pdf
- Supplementary Table S2_new.pdf
- Supplementary Table S3.pdf
- Supplementary Table S4.pdf
